# Supplementary material
Source: publisher figshare collection journal article supplement (https://frontiersin.figshare.com/ndownloader/files/13775264)
Supplement: Supplementary file 1 [file 13775264]

**Supplement – Legends:**

Supplement 1:

Coefficents of determination (CoD) and the t-values for each parameter detected in the multiple regression analysis for DOP, and of concentrations of dATP-P and dDNA-P. DOP as an influencing factor was included only for the calculation of the compounds. The calculations were performed with subgroups of factor when the CoD was =1 by including all parameters.

Supplement 2:

Coefficents of determination (CoD) and t-values for each parameter detected in the multiple regression analysis for uptake rates of DIP, dATP-P and dDNA-P. The calculations were performed with subgroups of factor when the CoD was =1 by including all parameters.

Supplement 3:

PCR analysis to identify the possible influence of filamentous cyanobacteria

and of picoorganisms on the dPL-P concentrations along the transect and in the eastern GB.

Supplement 4:

PCR analysis to identify the possible influence of various factors in the Storfjärden.

Supplement 5:

Relationship between the ratio of Tt:concentration and the uptake rates of DIP, dATP-P and dDNA-P in the Storfjärden. The mean values in Table 5 are used in the figure.

Supplement 6:

Relationship between DIP concentrations and TtDIP in the Storfjärden.
